# Supplementary material for: Validation of DM-Scan, a computer-assisted tool to assess mammographic density in full-field digital mammograms
Source: PubMed Central journal article supplement (PMC3693435; doi:10.1186/2193-1801-2-242), 2013-05-24

DM-scan & Cumulus PD estimates

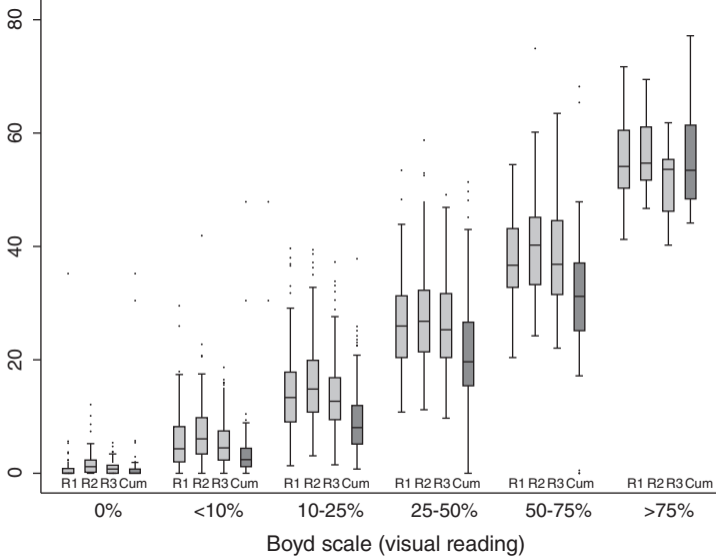

Supplement: 40064_2013_333_MOESM3_ESM.pdf [file 40064_2013_333_MOESM3_ESM.pdf]
